# Supplementary material
Source: MDPI journal article supplement (https://www.mdpi.com/search?q=ijerph-16-01635)
Supplement: s001 [file ijerph-16-01635-s001.pdf]

## Supplementary file

# Development and evaluation of a novel HNB based isothermal amplification assay for fast detection of Pyrimethamine resistance (S108N) in *Plasmodium falciparum*

Madhvi Chahar \*, Anup Anvikar and Neena Valecha

Division of Epidemiology & Clinical Research, National Institute of Malaria Research, Sector-8 Dwarka, New Delhi 110077, India; (A.A.) [anvikar@gmail.com](mailto:anvikar@gmail.com) ; (N.V.) [neenavalecha@gmail.com](mailto:neenavalecha@gmail.com)

(M.C.)\* Correspondence: [madhvi23rana@gmail.com](mailto:madhvi23rana@gmail.com)

Correspondence and requests for materials should be addressed to M.C.

**Table S1.** List of *P. falciparum* samples used in the repeatability test of SNP-LAMP for the fast detection of pyrimethamine resistant mutants (S108N) and their corroboration by gold standard sequencing method.

| Serial No. | <i>P. falciparum</i> samples | Region        | Resistance profile <sup>a</sup> | HNB LAMP <sup>b</sup> | Sequencing <sup>c</sup> |
|------------|------------------------------|---------------|---------------------------------|-----------------------|-------------------------|
| 1          | RI-01                        | Ranchi, India | PYR <sup>M</sup>                | +                     | +                       |
| 2          | RI-02                        | Ranchi, India | PYR <sup>M</sup>                | +                     | +                       |
| 3          | RI-03                        | Ranchi, India | PYR <sup>W</sup>                | -                     | -                       |
| 4          | RI-04                        | Ranchi, India | PYR <sup>W</sup>                | -                     | -                       |
| 5          | RI-05                        | Ranchi, India | PYR <sup>W</sup>                | -                     | -                       |
| 6          | RI-06                        | Ranchi, India | PYR <sup>W</sup>                | -                     | -                       |
| 7          | RI-07                        | Ranchi, India | PYR <sup>M</sup>                | +                     | +                       |
| 8          | RI-08                        | Ranchi, India | PYR <sup>W</sup>                | -                     | -                       |
| 9          | RI-09                        | Ranchi, India | PYR <sup>W</sup>                | -                     | -                       |
| 10         | RI-10                        | Ranchi, India | PYR <sup>W</sup>                | -                     | -                       |
| 11         | RI-11                        | Ranchi, India | PYR <sup>M</sup>                | +                     | +                       |
| 12         | RI-12                        | Ranchi, India | PYR <sup>W</sup>                | -                     | -                       |
| 13         | RI-13                        | Ranchi, India | PYR <sup>M</sup>                | +                     | +                       |
| 14         | RI-14                        | Ranchi, India | PYR <sup>W</sup>                | -                     | -                       |
| 15         | RI-15                        | Ranchi, India | PYR <sup>W</sup>                | -                     | -                       |
| 16         | RI-16                        | Ranchi, India | PYR <sup>W</sup>                | -                     | -                       |
| 17         | RI-17                        | Ranchi, India | PYR <sup>W</sup>                | -                     | -                       |
| 18         | RI-18                        | Ranchi, India | PYR <sup>W</sup>                | -                     | -                       |
| 19         | RI-19                        | Ranchi, India | PYR <sup>M</sup>                | +                     | +                       |
| 20         | RI-20                        | Ranchi, India | PYR <sup>W</sup>                | -                     | -                       |
| 21         | RI-21                        | Ranchi, India | PYR <sup>W</sup>                | -                     | -                       |
| 22         | RI-22                        | Ranchi, India | PYR <sup>W</sup>                | -                     | -                       |
| 23         | RI-23                        | Ranchi, India | PYR <sup>W</sup>                | -                     | -                       |
| 24         | RI-24                        | Ranchi, India | PYR <sup>M</sup>                | +                     | +                       |
| 25         | RI-25                        | Ranchi, India | PYR <sup>M</sup>                | +                     | +                       |
| 26         | RI-26                        | Ranchi, India | PYR <sup>W</sup>                | -                     | -                       |
| 27         | RI-27                        | Ranchi, India | PYR <sup>W</sup>                | -                     | -                       |
| 28         | RI-28                        | Ranchi, India | PYR <sup>M</sup>                | +                     | +                       |
| 29         | RI-29                        | Ranchi, India | PYR <sup>W</sup>                | -                     | -                       |
| 30         | RI-30                        | Ranchi, India | PYR <sup>W</sup>                | -                     | -                       |
| 31         | RI-31                        | Ranchi, India | PYR <sup>W</sup>                | -                     | -                       |

|    |       |                |                  |   |   |
|----|-------|----------------|------------------|---|---|
| 32 | RI-32 | Ranchi, India  | PYR <sup>M</sup> | + | + |
| 33 | RI-33 | Ranchi, India  | PYR <sup>W</sup> | - | - |
| 34 | RI-34 | Ranchi, India  | PYR <sup>W</sup> | - | - |
| 35 | RI-35 | Ranchi, India  | PYR <sup>M</sup> | + | + |
| 36 | RI-36 | Ranchi, India  | PYR <sup>M</sup> | + | + |
| 37 | RI-37 | Ranchi, India  | PYR <sup>W</sup> | - | - |
| 38 | RI-38 | Ranchi, India  | PYR <sup>W</sup> | - | - |
| 39 | RI-39 | Tripura, India | PYR <sup>W</sup> | - | - |
| 40 | RI-40 | Ranchi, India  | PYR <sup>M</sup> | + | + |
| 41 | RI-41 | Ranchi, India  | PYR <sup>W</sup> | - | - |
| 42 | RI-42 | Ranchi, India  | PYR <sup>M</sup> | + | + |
| 43 | RI-43 | Ranchi, India  | PYR <sup>W</sup> | - | - |
| 44 | RI-44 | Ranchi, India  | PYR <sup>W</sup> | - | - |
| 45 | RI-45 | Ranchi, India  | PYR <sup>M</sup> | + | + |
| 46 | RI-46 | Ranchi, India  | PYR <sup>M</sup> | + | + |
| 47 | RI-47 | Ranchi, India  | PYR <sup>M</sup> | + | + |
| 48 | RI-48 | Ranchi, India  | PYR <sup>W</sup> | - | - |
| 49 | RI-49 | Ranchi, India  | PYR <sup>M</sup> | + | + |
| 50 | RI-50 | Ranchi, India  | PYR <sup>W</sup> | - | - |
| 51 | RI-51 | Ranchi, India  | PYR <sup>W</sup> | - | - |
| 52 | RI-52 | Ranchi, India  | PYR <sup>W</sup> | - | - |
| 53 | RI-53 | Ranchi, India  | PYR <sup>M</sup> | + | + |
| 54 | RI-54 | Ranchi, India  | PYR <sup>W</sup> | - | - |
| 55 | RI-55 | Ranchi, India  | PYR <sup>M</sup> | + | + |
| 56 | RI-56 | Ranchi, India  | PYR <sup>W</sup> | - | - |
| 57 | RI-57 | Ranchi, India  | PYR <sup>W</sup> | - | - |
| 58 | RI-58 | Ranchi, India  | PYR <sup>W</sup> | - | - |
| 59 | RI-59 | Ranchi, India  | PYR <sup>M</sup> | + | + |
| 60 | RI-60 | Ranchi, India  | PYR <sup>W</sup> | - | - |
| 61 | RI-61 | Ranchi, India  | PYR <sup>W</sup> | - | - |
| 62 | RI-62 | Ranchi, India  | PYR <sup>M</sup> | + | + |
| 63 | RI-63 | Ranchi, India  | PYR <sup>M</sup> | + | + |
| 64 | RI-64 | Ranchi, India  | PYR <sup>W</sup> | - | - |
| 65 | RI-65 | Ranchi, India  | PYR <sup>W</sup> | - | - |
| 66 | TR-66 | Ranchi, India  | PYR <sup>M</sup> | + | + |
| 67 | TR-67 | Ranchi, India  | PYR <sup>W</sup> | - | - |
| 68 | TR-68 | Ranchi, India  | PYR <sup>M</sup> | + | + |
| 69 | TR-69 | Ranchi, India  | PYR <sup>M</sup> | + | + |
| 70 | TR-70 | Ranchi, India  | PYR <sup>M</sup> | + | + |
| 71 | TR-71 | Ranchi, India  | PYR <sup>W</sup> | - | - |
| 72 | TR-72 | Ranchi, India  | PYR <sup>W</sup> | - | - |
| 73 | TR-73 | Ranchi, India  | PYR <sup>W</sup> | - | - |
| 74 | TR-74 | Ranchi, India  | PYR <sup>M</sup> | + | + |
| 75 | TR-75 | Ranchi, India  | PYR <sup>M</sup> | + | + |
| 76 | TR-76 | Ranchi, India  | PYR <sup>W</sup> | - | - |
| 77 | TR-77 | Ranchi, India  | PYR <sup>M</sup> | + | + |
| 78 | TR-78 | Ranchi, India  | PYR <sup>W</sup> | - | - |
| 79 | TR-79 | Ranchi, India  | PYR <sup>W</sup> | - | - |
| 80 | TR-80 | Ranchi, India  | PYR <sup>M</sup> | + | + |
| 81 | TR-81 | Ranchi, India  | PYR <sup>W</sup> | - | - |
| 82 | TR-82 | Ranchi, India  | PYR <sup>M</sup> | + | + |
| 83 | TR-83 | Ranchi, India  | PYR <sup>W</sup> | - | - |
| 84 | TR-84 | Ranchi, India  | PYR <sup>M</sup> | + | + |
| 85 | TR-85 | Ranchi, India  | PYR <sup>W</sup> | - | - |
| 86 | TR-86 | Ranchi, India  | PYR <sup>W</sup> | - | - |
| 87 | TR-87 | Ranchi, India  | PYR <sup>W</sup> | - | - |
| 88 | TR-88 | Ranchi, India  | PYR <sup>M</sup> | + | + |
| 89 | TR-89 | Ranchi, India  | PYR <sup>M</sup> | + | + |
| 90 | TR-90 | Ranchi, India  | PYR <sup>W</sup> | - | - |
| 91 | TR-91 | Ranchi, India  | PYR <sup>W</sup> | - | - |

|     |        |                       |                  |   |   |
|-----|--------|-----------------------|------------------|---|---|
| 92  | TR-92  | Ranchi, India         | PYR <sup>M</sup> | + | + |
| 93  | TR-93  | Ranchi, India         | PYR <sup>W</sup> | - | - |
| 94  | TR-94  | Ranchi, India         | PYR <sup>M</sup> | + | + |
| 95  | TR-95  | Ranchi, India         | PYR <sup>W</sup> | - | - |
| 96  | TR-96  | Ranchi, India         | PYR <sup>W</sup> | - | - |
| 97  | TR-97  | Ranchi, India         | PYR <sup>M</sup> | + | + |
| 98  | TR-98  | Ranchi, India         | PYR <sup>W</sup> | - | - |
| 99  | TR-99  | Ranchi, India         | PYR <sup>M</sup> | + | + |
| 100 | TR-100 | Ranchi, India         | PYR <sup>M</sup> | + | + |
| A*  | 3D7    | Malaria parasite bank | PYR <sup>W</sup> | - | - |
| C*  | DD2    | Malaria parasite bank | PYR <sup>M</sup> | + | + |

<sup>a</sup>, PYR<sup>M</sup> and PYR<sup>W</sup> state that the *P. falciparum* sample is mutant(S108N) and wild type to pyrimethamine respectively. <sup>b</sup> and <sup>c</sup> '+' and '-' indicate the positive and negative results by SNP-LAMP assay and gold standard Sequencing. \* Specifies the wild type & mutant control of *P. falciparum*.
